# Supplementary material for: CMTR1 promotes colorectal cancer cell growth and immune evasion by transcriptionally regulating STAT3
Source: PubMed Central journal article supplement (PMC10079662; doi:10.1038/s41419-023-05767-3), 2023-04-06

**Figure 1E-H**

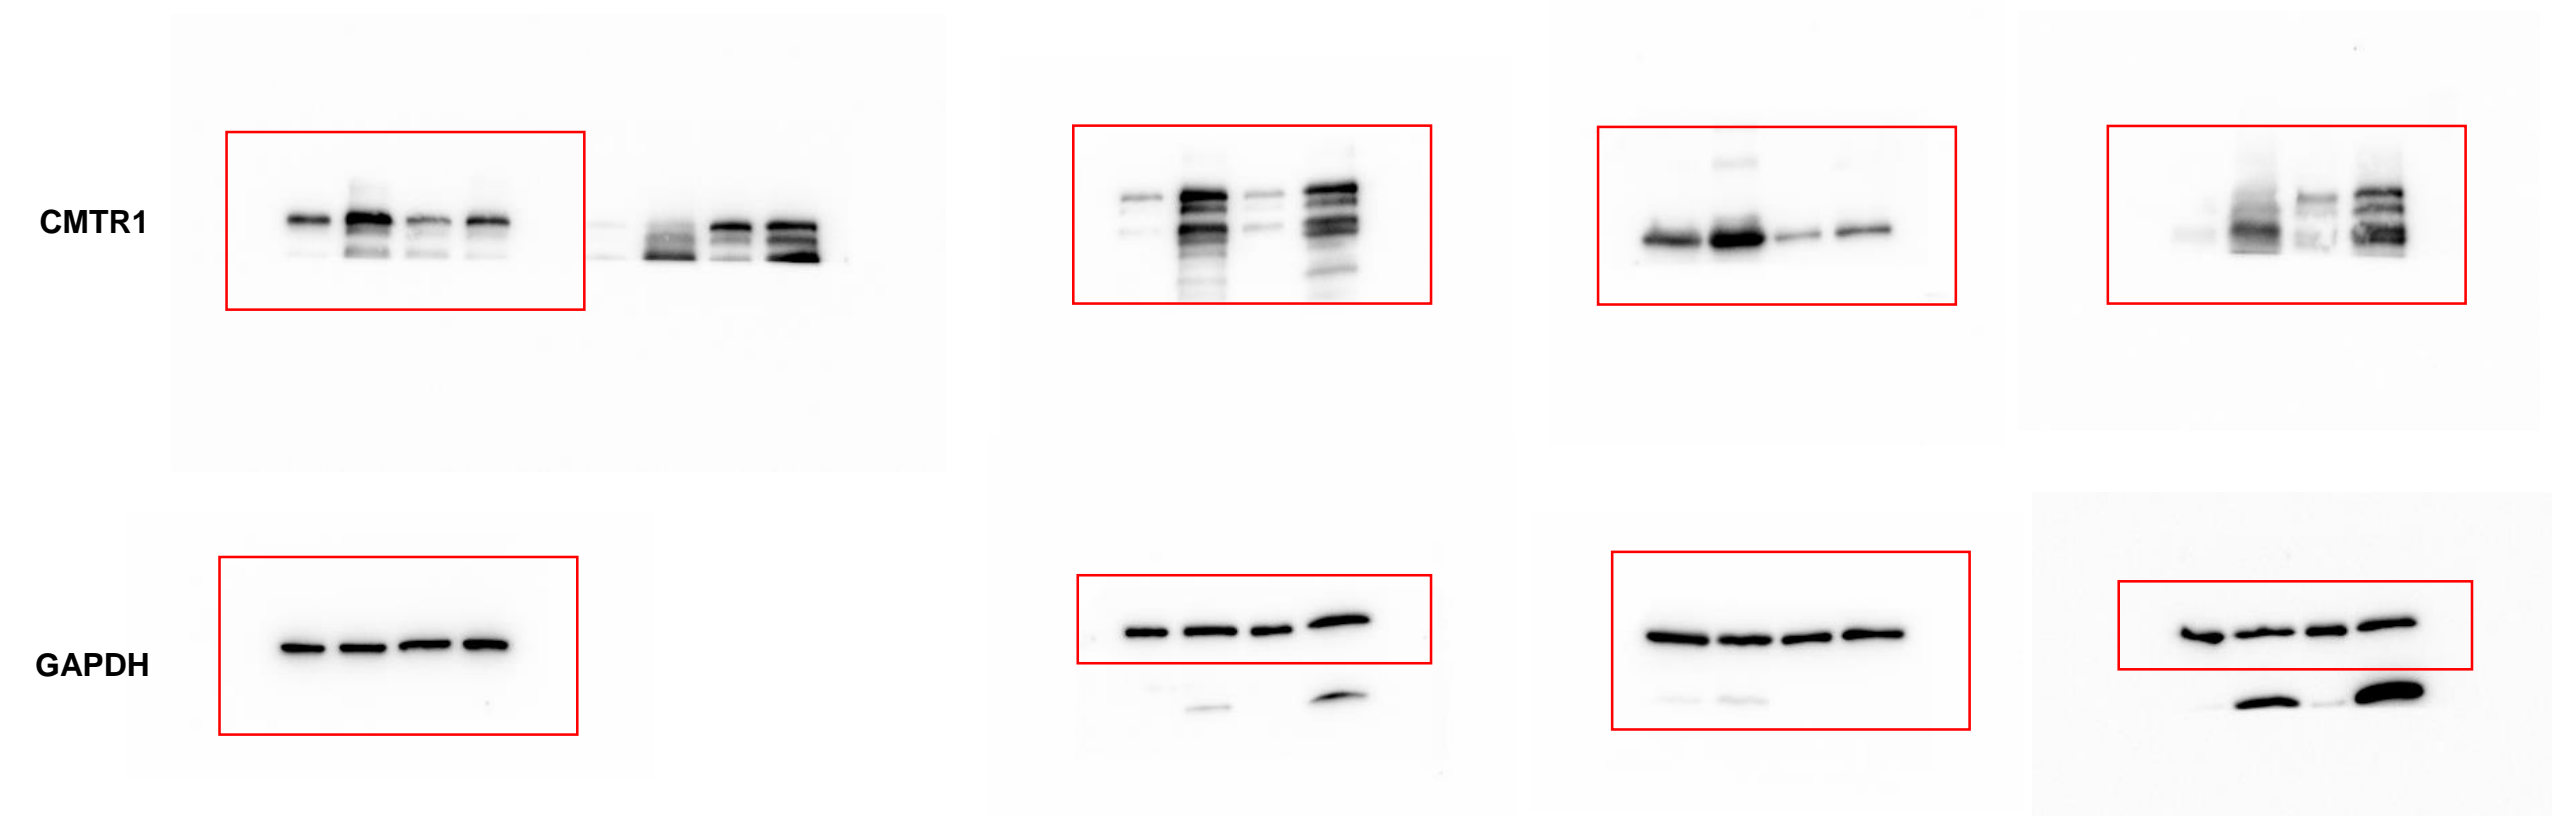

**Figure 2P**

**CMTR1**

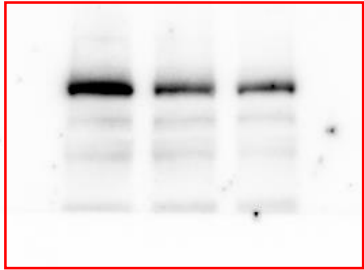

**CDKN1A**

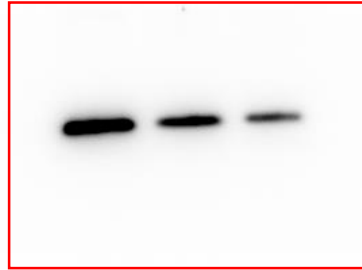

**CDK6**

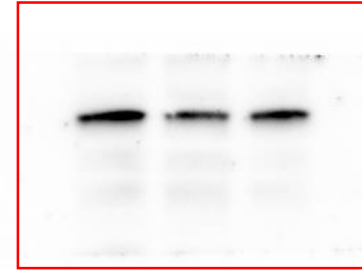

**CCND1**

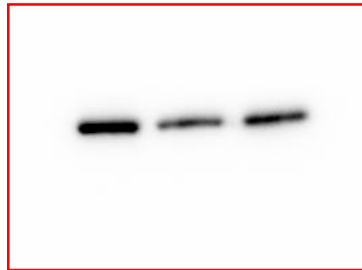

**GAPDH**

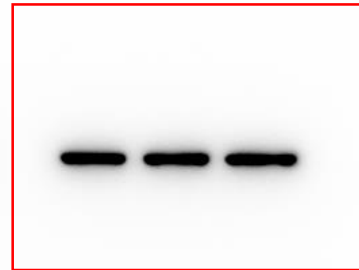

**Figure 2Q**

**CMTR1**

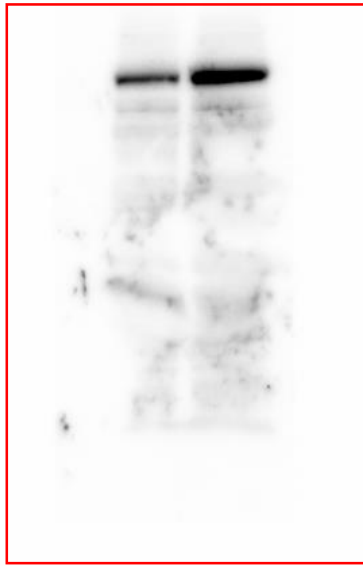

**CDKN1A**

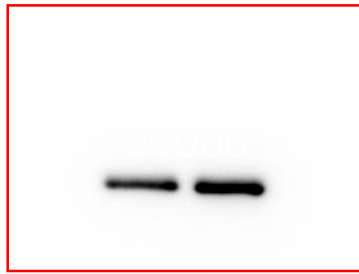

**CDK6**

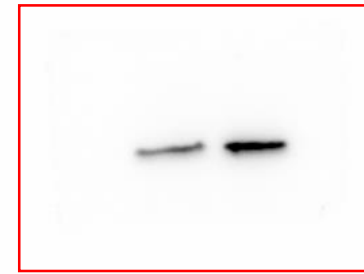

**CCND1**

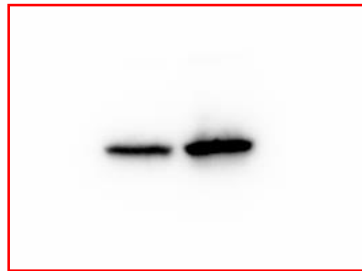

**GAPDH**

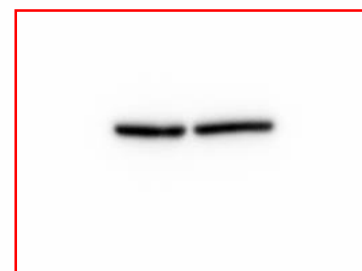

**Figure 4D**

**pSTAT3**

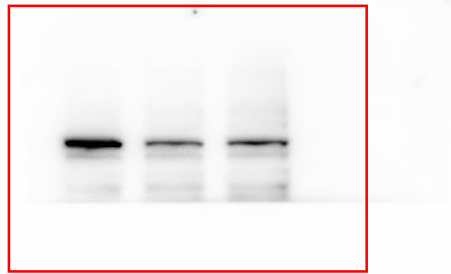

**STAT3**

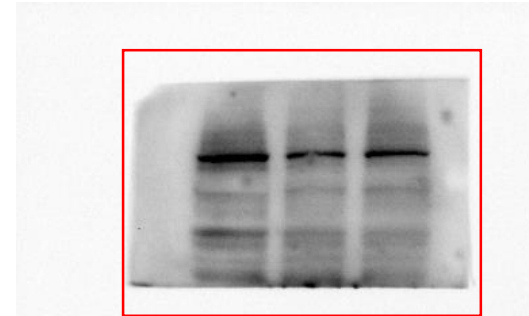

**GAPDH**

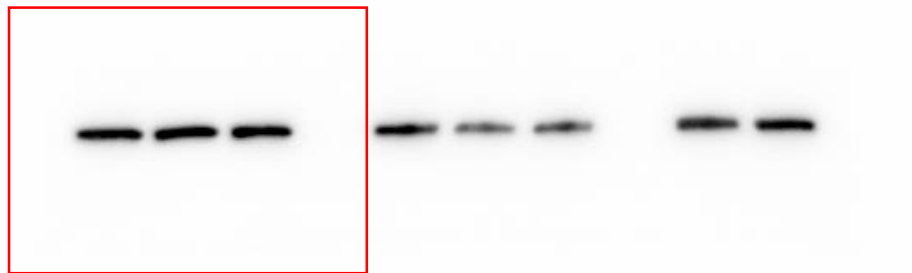

**Figure 4E**

**pSTAT3**

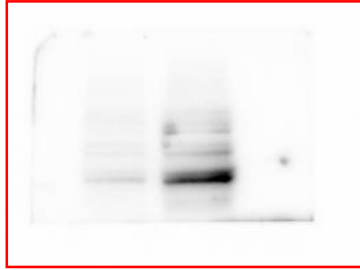

**STAT3**

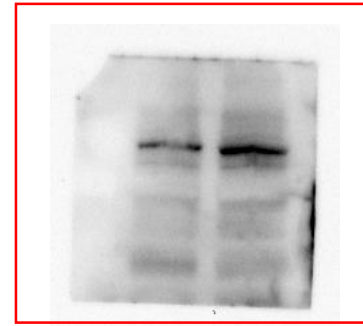

**GAPDH**

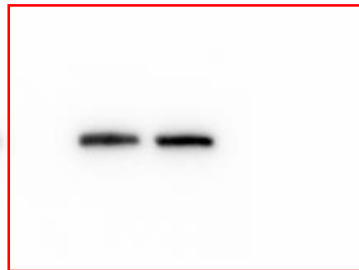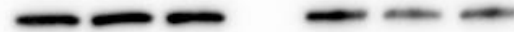

**Figure 5C**

**CMTR1**

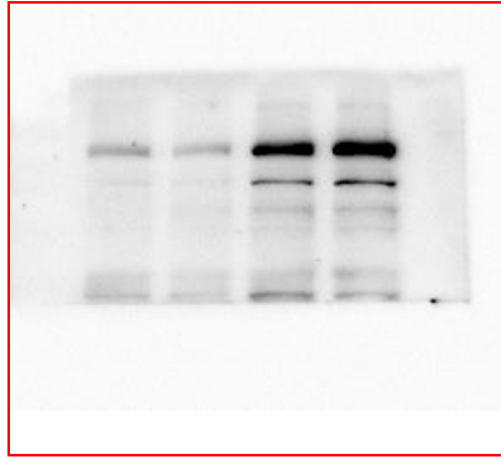

**STAT3**

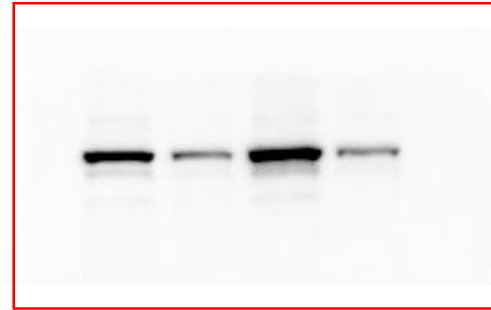

**GAPDH**

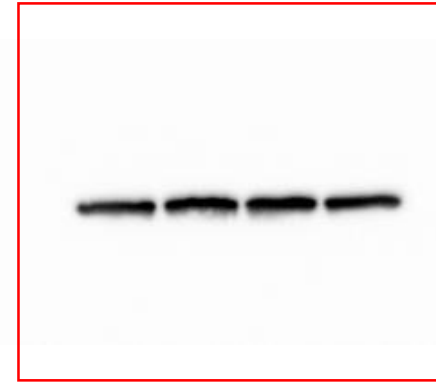

**Figure 6C**

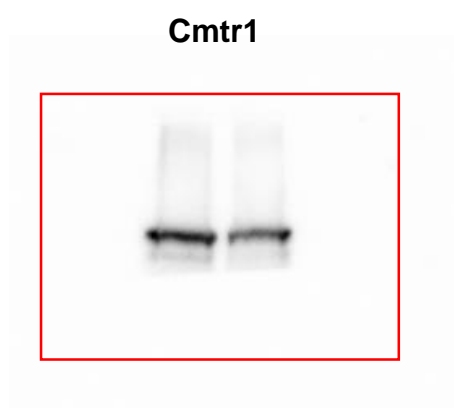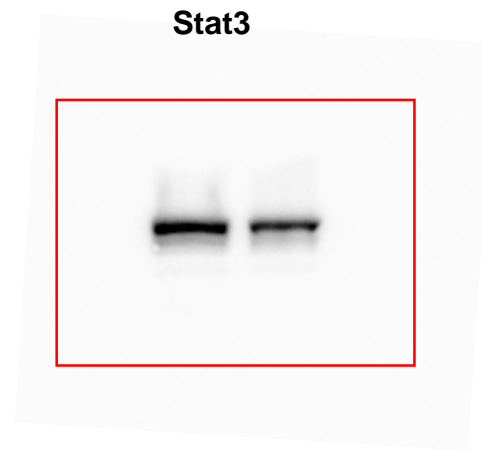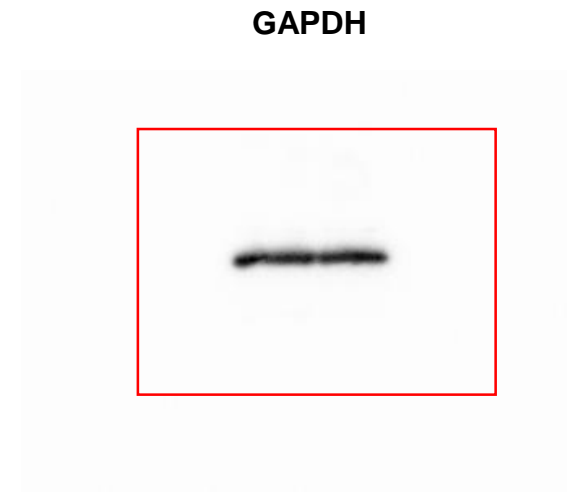

**Figure S1**

**CMTR1**

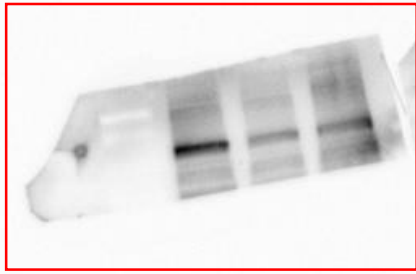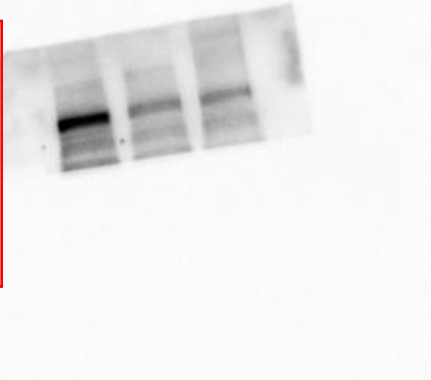

**CDKN1A**

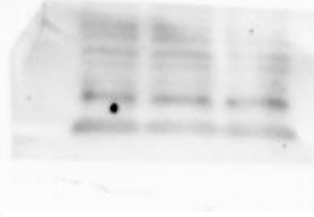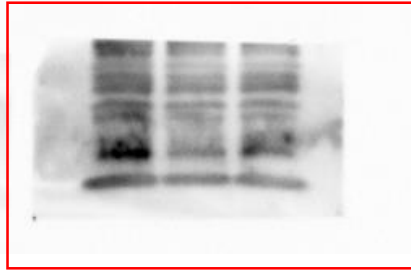

**CDK6**

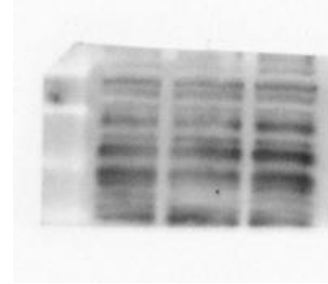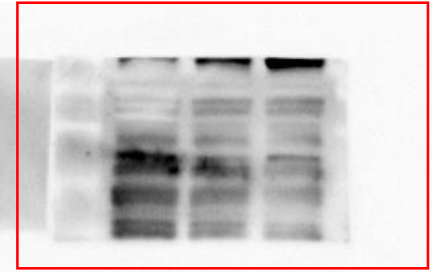

**CCND1**

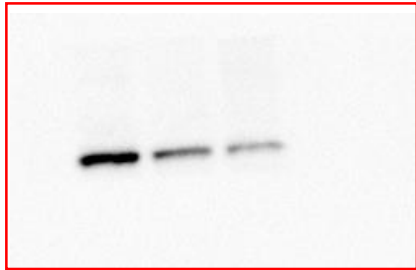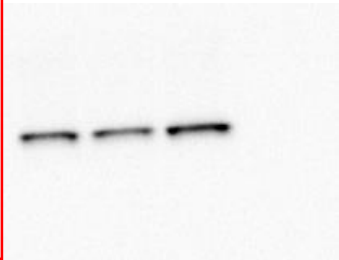

**pSTAT3**

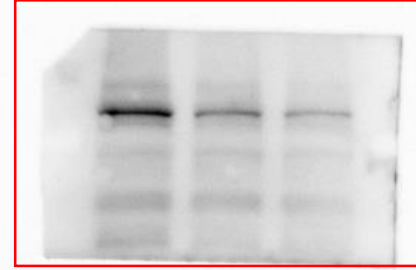

**STAT3**

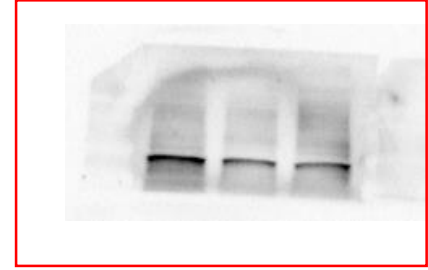

**GAPDH**

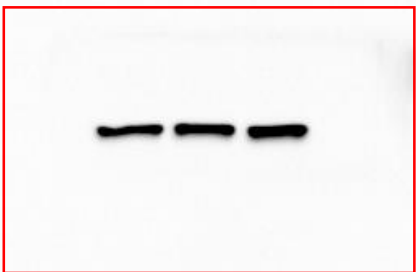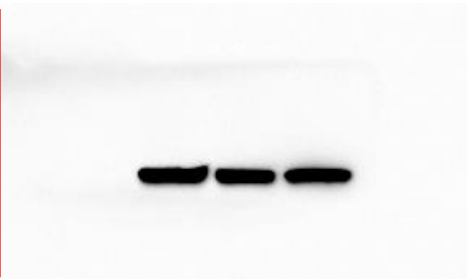



**Figure S2**

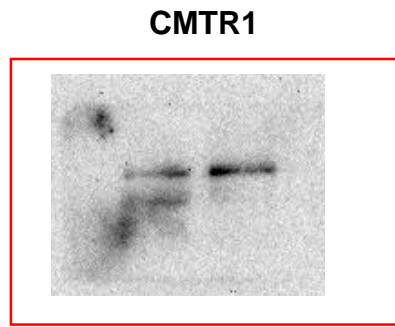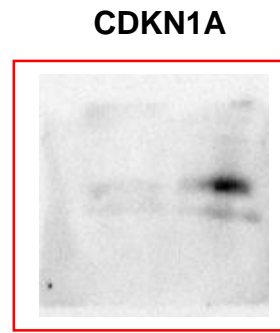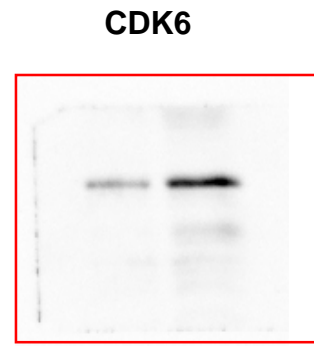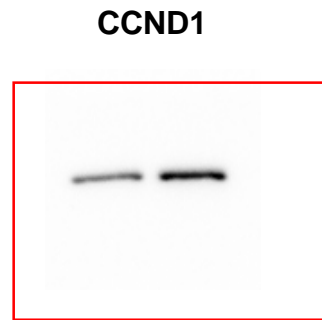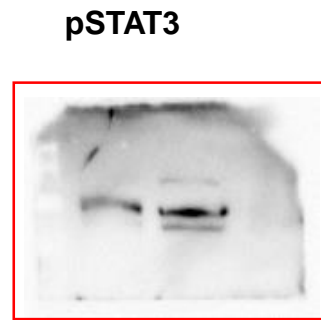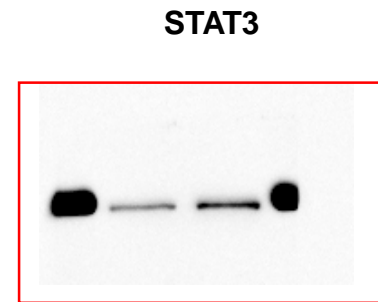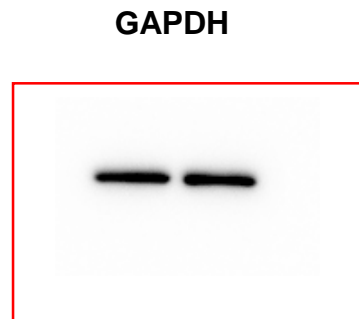

**Figure S5A**

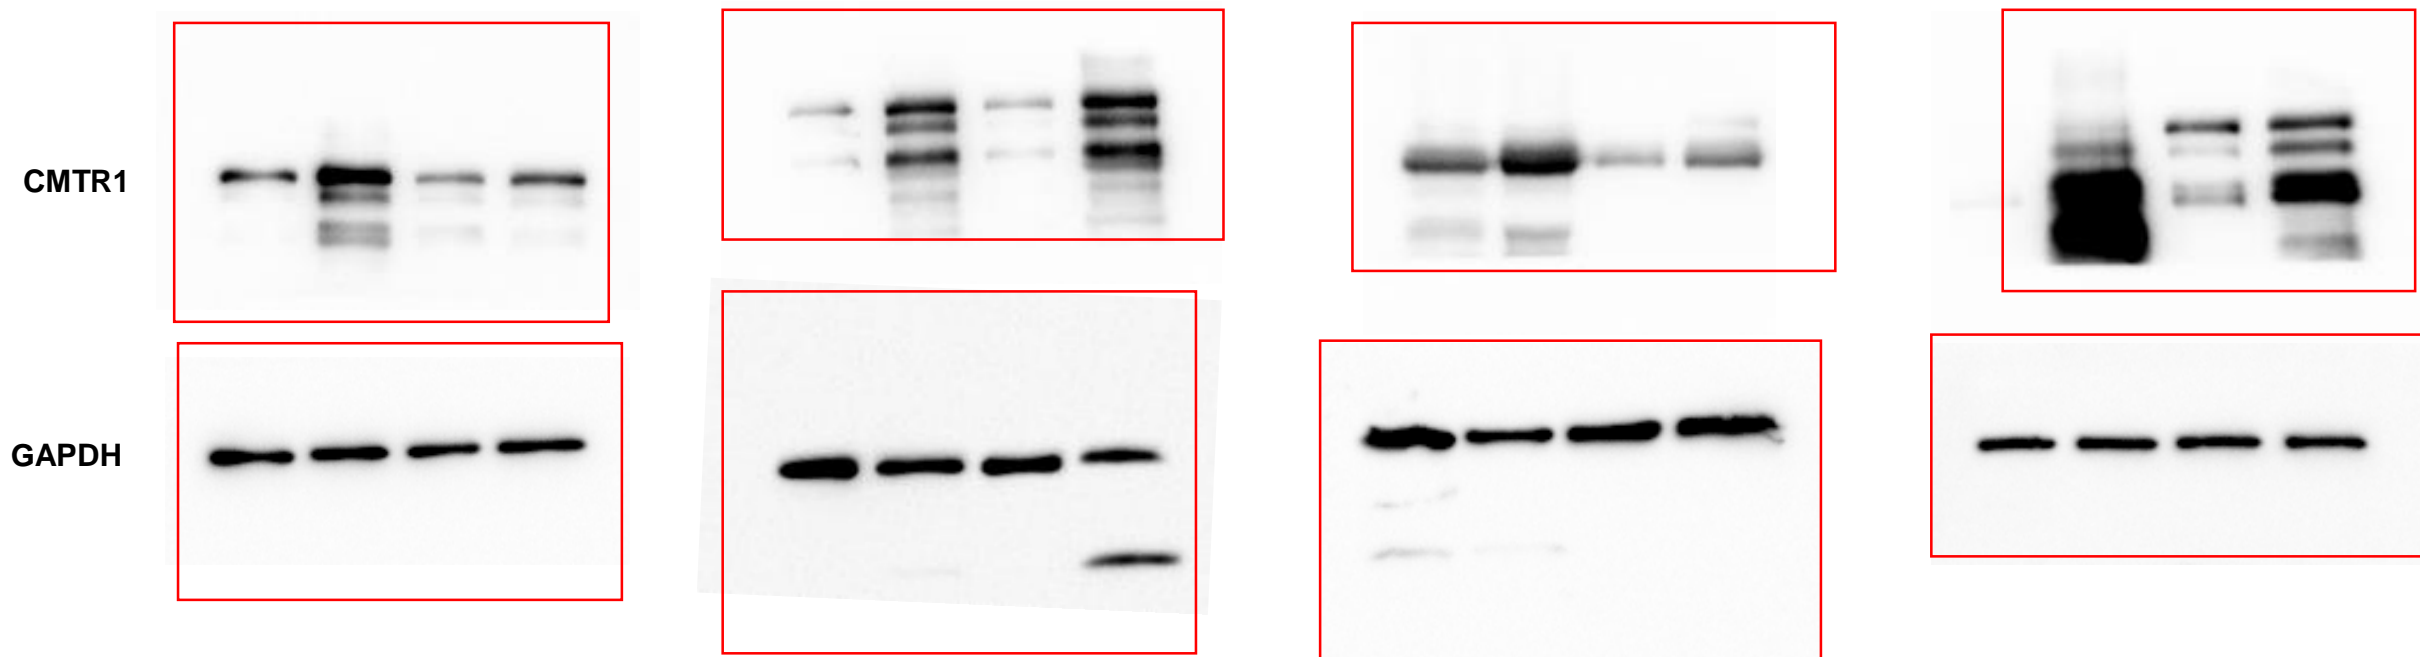

**Figure S5B**

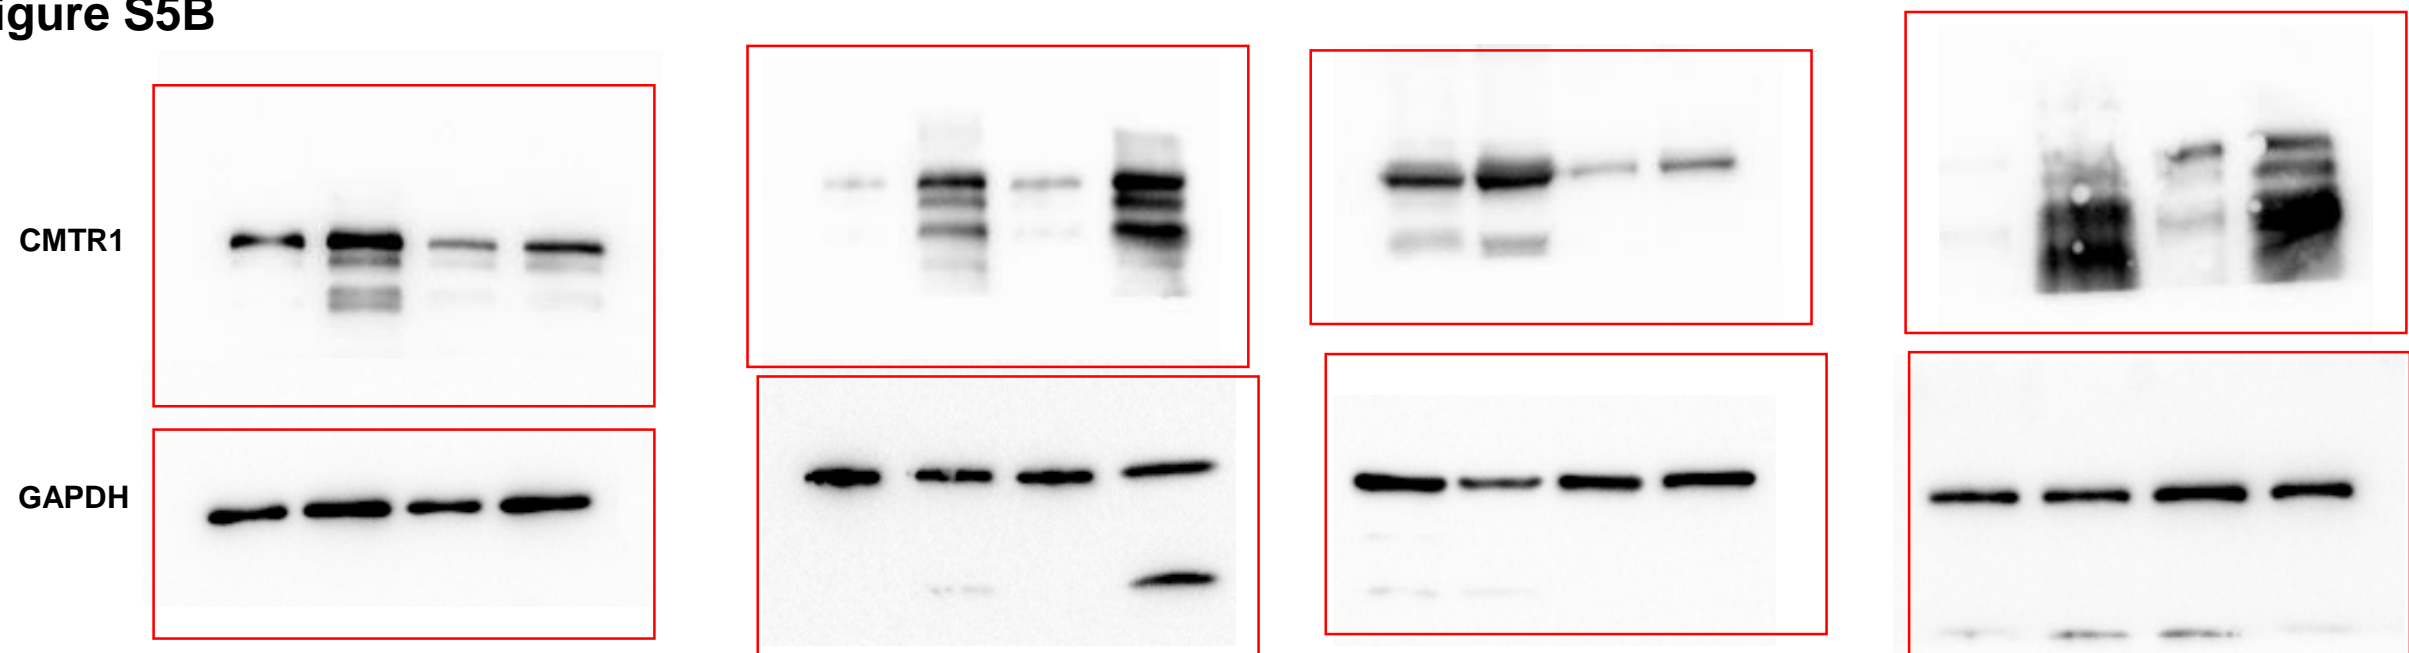

**Figure S6A**

**CMTR1**

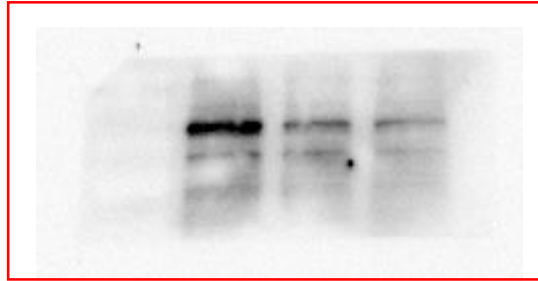

**CDKN1A**

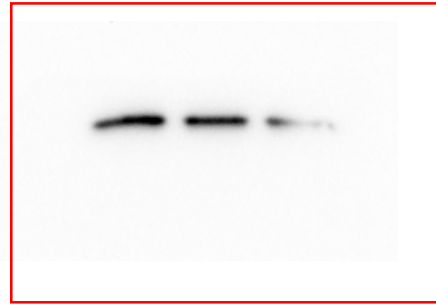

**CDK6**

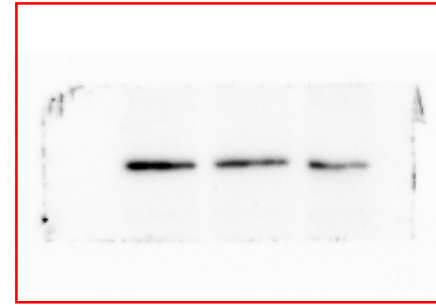

**CCND1**

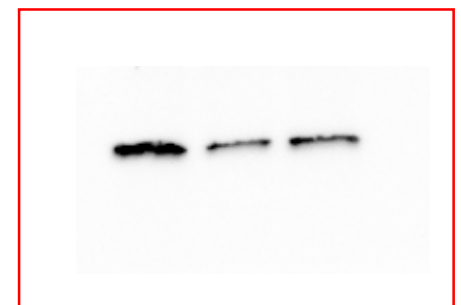

**pSTAT3**

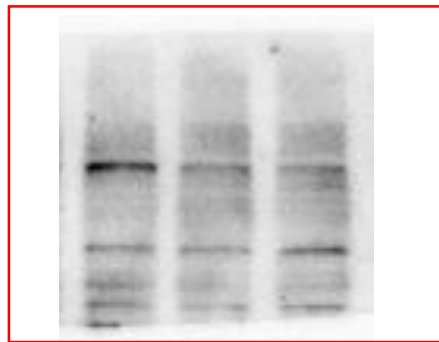

**STAT3**

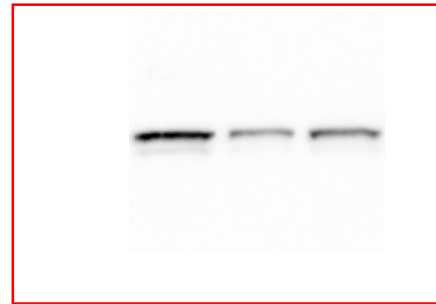

**GAPDH**

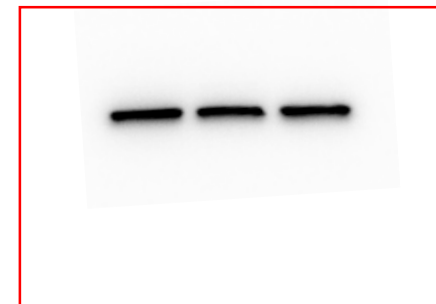

**Figure S6B**

**CMTR1**

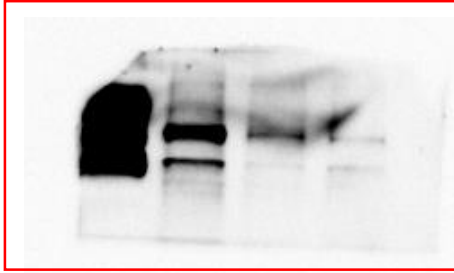

**CDKN1A**

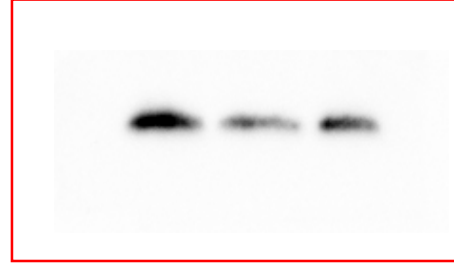

**CDK6**

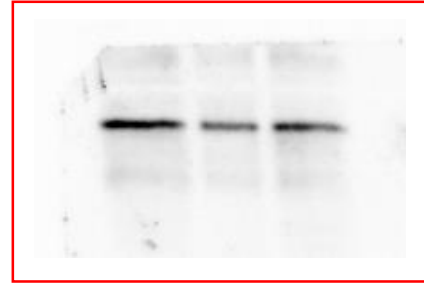

**CCND1**

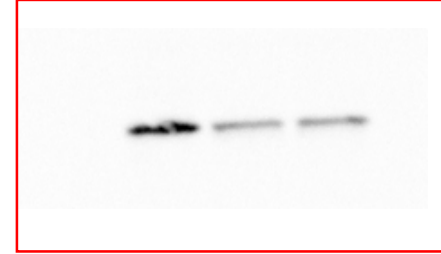

**pSTAT3**

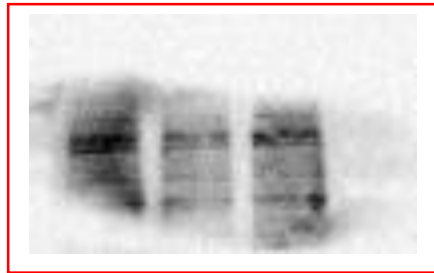

**STAT3**

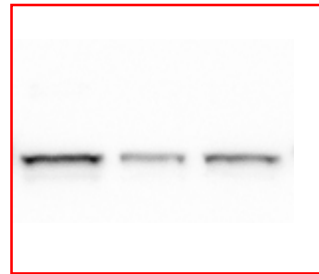

**GAPDH**

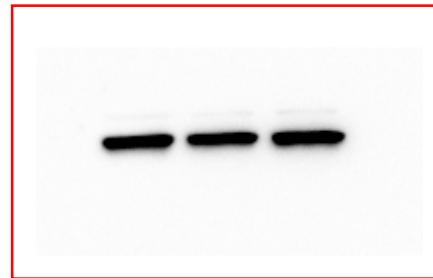

**Figure S6C**

**CMTR1**

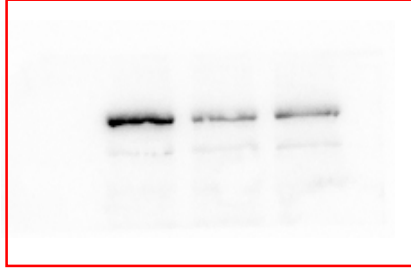

**CDKN1A**

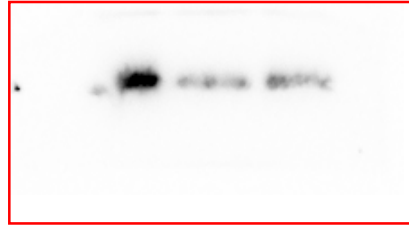

**CDK6**

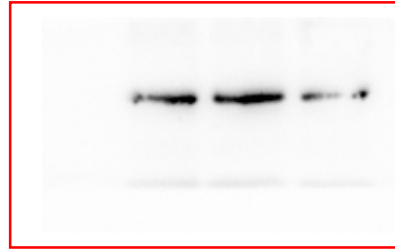

**CCND1**

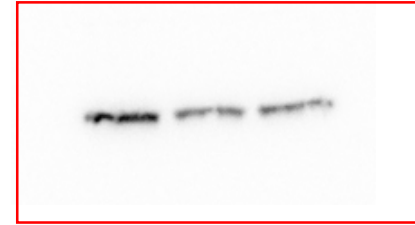

**pSTAT3**

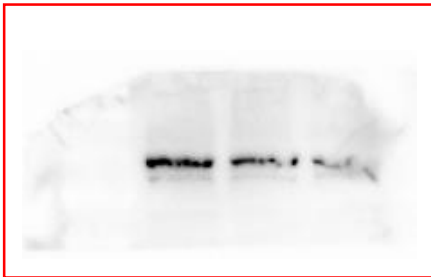

**STAT3**

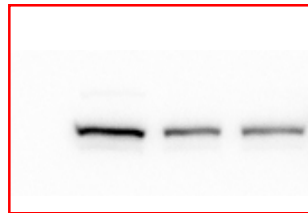

**GAPDH**

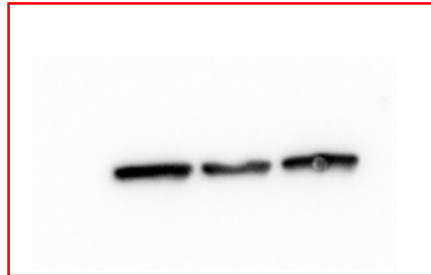

**Figure S6D**

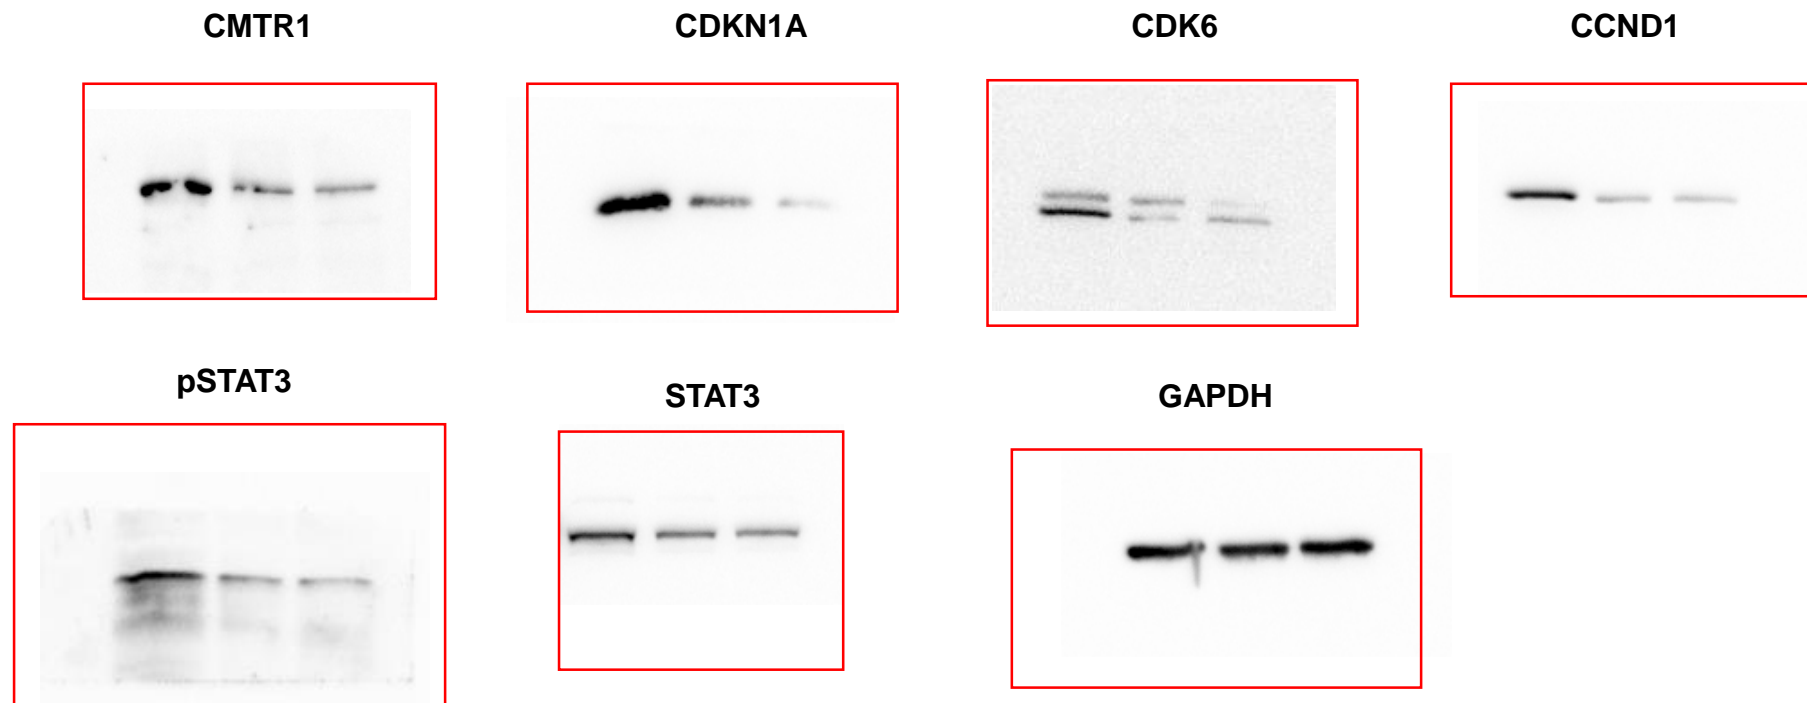

**Figure S7A**

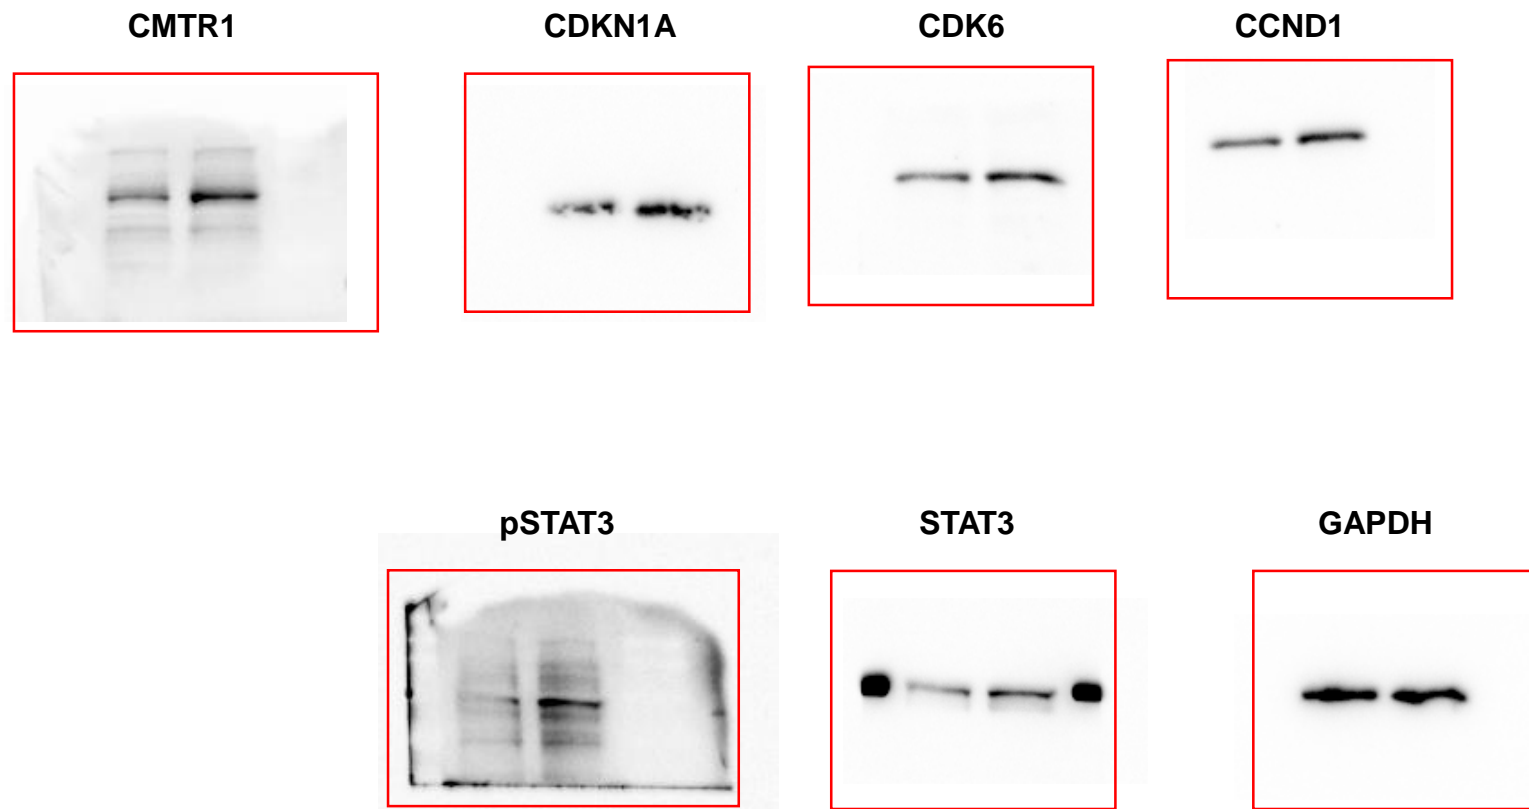

**Figure S7B**

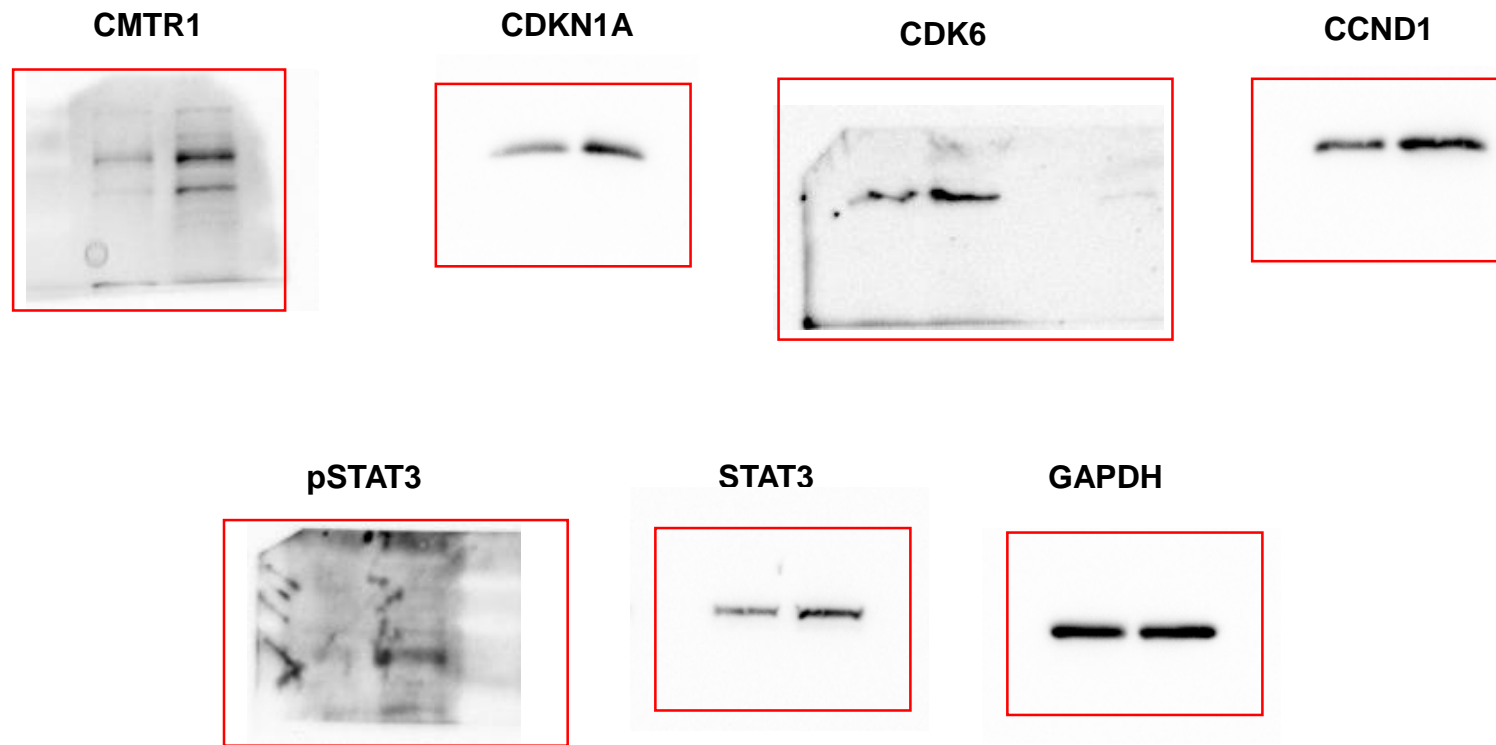



**Figure S7C**

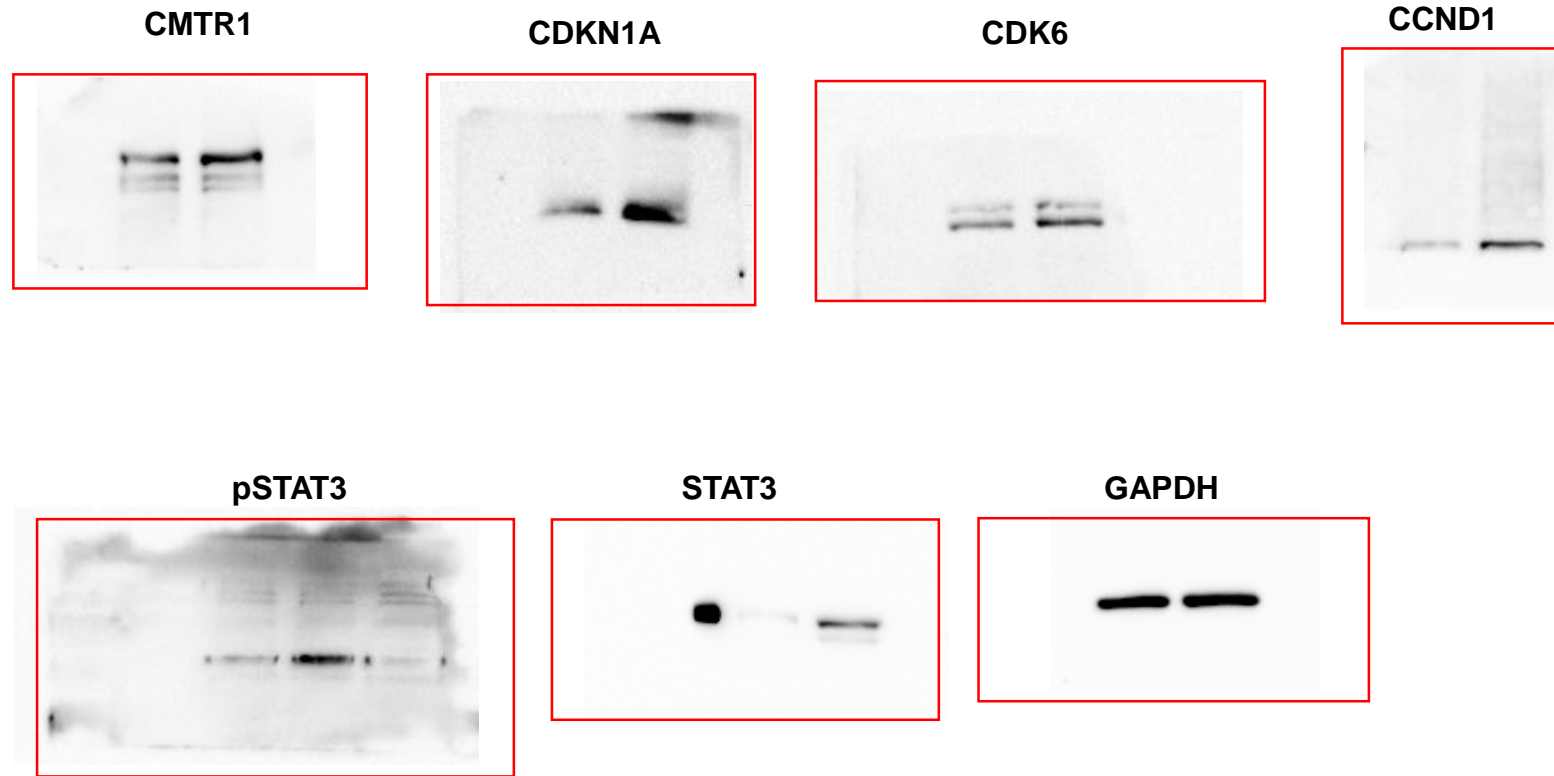

**Figure S7D**

**CMTR1**

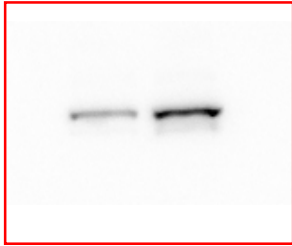

**CDKN1A**

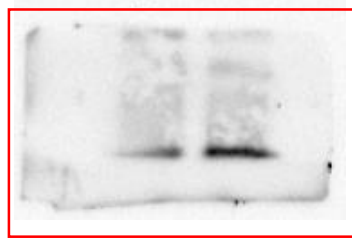

**CDK6**

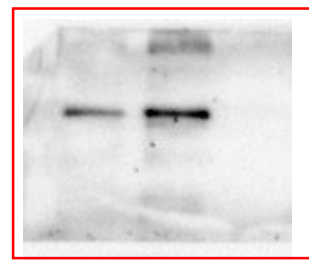

**CCND1**

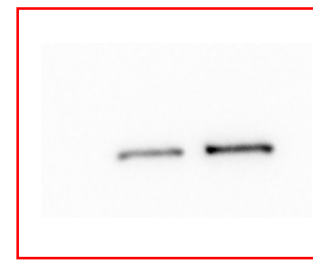

**pSTAT3**

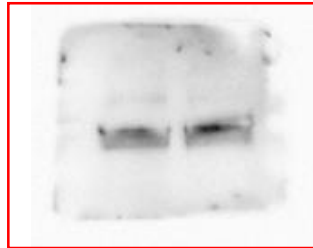

**STAT3**

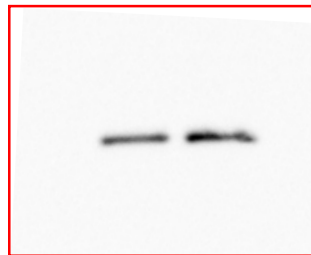

**GAPDH**

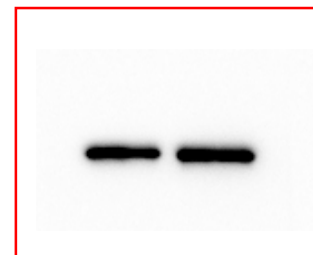

Supplement: 41419_2023_5767_MOESM3_ESM.pdf [file 41419_2023_5767_MOESM3_ESM.pdf]
